# Supplementary material
Source: PubMed Central journal article supplement (PMC5679120)
Supplement: NIHMS895468-supplement-supplement_1.pdf [file NIHMS895468-supplement-supplement_1.pdf]

The Additional Costs and Health Effects of a Patient Being Overweight or Having Obesity: A Computational Model

Saeideh Fallah-Fini, PhD<sup>1,2</sup>, Atif Adam, MBBS<sup>1</sup>, Lawrence J. Cheskin, MD<sup>1</sup>, Sarah M. Bartsch, MPH<sup>1</sup>, Bruce Y. Lee, MD<sup>1</sup>

Affiliations:

<sup>1</sup>Global Obesity Prevention Center (GOPC) at Johns Hopkins Bloomberg School of Public Health, Baltimore, MD, USA

<sup>2</sup>Industrial and Manufacturing Engineering Department, California State Polytechnic University, Pomona, CA, USA

Contact Info:

Bruce Y. Lee, MD MBA

Global Obesity Prevention Center (GOPC)

Johns Hopkins Bloomberg School of Public Health

615 N. Wolfe Street, Room W3501

Baltimore, MD 21205

Email: [brucelee@jhu.edu](mailto:brucelee@jhu.edu)

Phone: 410-502-6079

Fax: 443-873-501

**Table S1:** Values of utility and cost parameters and associated references

| Variable                            | Distribution type | Mean     | Range or standard deviation | Source |
|-------------------------------------|-------------------|----------|-----------------------------|--------|
| <b>Utility Values</b>               |                   |          |                             |        |
| Stroke                              | Beta              | 0.6      | 0.09                        | (1-46) |
| CHD                                 | Beta              | 0.73     | 0.1                         |        |
| Diabetic nephropathy                | Beta              | 0.74     | 0.09                        |        |
| Diabetic neuropathy                 | Beta              | 0.65     | 0.04                        |        |
| Diabetic retinopathy                | Beta              | 0.78     | 0.04                        |        |
| ESRD                                | Beta              | 0.63     | 0.03                        |        |
| Blindness                           | Beta              | 0.52     | 0.06                        |        |
| Renal Cancer                        | Beta              | 0.7      | 0.06                        |        |
| Cervical Cancer                     | Beta              | 0.63     | 0.11                        |        |
| Pancreatic Cancer                   | Beta              | 0.66     | 0.08                        |        |
| Gastric Cancer                      | Beta              | 0.52     | 0.08                        |        |
| Hypertension                        | Beta              | 0.97     | 0.01                        |        |
| Prostate                            | Beta              | 0.71     | 0.16                        |        |
| DM2                                 | Beta              | 0.85     | 0.08                        |        |
| Breast Cancer-First year            | Beta              | 0.66     | 0.06                        |        |
| Breast Cancer-After First year      | Beta              | 0.77     | 0.06                        |        |
| Breast Cancer-Last year             | Beta              | 0.23     | 0.001                       |        |
| Colon Cancer-First year             | Beta              | 0.52     | 0.12                        |        |
| Colon Cancer-After First year       | Beta              | 0.83     | 0.05                        |        |
| Colon Cancer-Last year              | Beta              | 0.3      | 0.001                       |        |
| Esophageal Cancer-Early years       | Beta              | 0.71     | 0.22                        |        |
| Esophageal Cancer-Last year         | Beta              | 0.34     | 0.001                       |        |
| Uterine Cancer-Early years          | Beta              | 0.69     | 0.15                        |        |
| Uterine Cancer-Last year            | Beta              | 0.79     | 0.11                        |        |
| <b>Cost Values</b>                  |                   |          |                             |        |
| Stage 1 (CHS1)                      |                   | \$497    |                             | (47)   |
| Stage 2 (CHS2)                      |                   | \$1,123  |                             |        |
| Normal Weight-Stage 3 (CHS3)        |                   | \$1,680  |                             |        |
| Overweight-Stage 3 (CHS3)           |                   | \$2,055  |                             |        |
| Obese-Stage 3 (CHS3)                |                   | \$3,930  |                             |        |
| Normal Weight-Stage 4 (CHS4)        |                   | \$2,906  |                             |        |
| Overweight Stage 4 (CHS4)           |                   | \$3,656  |                             |        |
| Obese-Stage 4 (CHS4)                |                   | \$7,406  |                             |        |
| CHD-1 <sup>st</sup> Year-Age 18-44  | Gamma             | \$19,933 | \$24,824                    |        |
| CHD-1 <sup>st</sup> Year-Age 44- 65 | Gamma             | \$17,244 | \$11,109                    |        |
| CHD-1 <sup>st</sup> Year-Age>65     | Gamma             | \$13,724 | \$9,324                     |        |
| CHD-After first year-Age 18-44      | Gamma             | \$5,178  | \$14,673                    |        |
| CHD-After first year-Age 44-65      | Gamma             | \$6,926  | \$18,766                    |        |
| CHD-After first year-Age > 65       | Gamma             | \$4,100  | \$11,576                    |        |
| DM2-Age 18-44                       | Gamma             | \$11,706 | \$17,764                    |        |
| DM2-Age 44-65                       | Gamma             | \$8,109  | \$22,031                    |        |
| DM2-Age > 65                        | Gamma             | \$1,332  | \$3,409                     |        |
| Hypertension-Age 18-44              | Gamma             | \$672    | \$3,373                     |        |
| Hypertension-Age 44-65              | Gamma             | \$867    | \$3,895                     |        |
| Hypertension-Age > 65               | Gamma             | \$1,050  | \$3,901                     |        |

| Variable                                   | Distribution type | Mean      | Range or standard deviation | Source |
|--------------------------------------------|-------------------|-----------|-----------------------------|--------|
| Diabetic Nephropathy                       | Gamma             | \$593     | \$220                       | (48)   |
| ESRD-Initial year                          | Gamma             | \$95,130  | \$31,396                    | (49)   |
| ESRD-After Initial year                    | Gamma             | \$62,578  | \$15,802                    |        |
| Diabetic Neuropathy                        | Gamma             | \$456     | \$323                       | (47)   |
| Diabetic Retinopathy                       | Gamma             | \$650     | \$363                       |        |
| Blindness                                  | Gamma             | \$2,872   | \$75                        |        |
| Stroke-Age 18-44                           | Gamma             | \$11,034  | \$16,744                    |        |
| Stroke-Age 44-65                           | Gamma             | \$7,643   | \$20,766                    |        |
| Stroke-Age > 65                            | Gamma             | \$7,098   | \$13,860                    |        |
| Breast cancer-First year-Females           |                   | \$25,386  |                             | (50)   |
| Breast cancer-After First year- Females    |                   | \$2,207   |                             |        |
| Breast cancer-Last year-Females            |                   | \$78,570  |                             |        |
| Cervical cancer-First year-Females         |                   | \$49,692  |                             |        |
| Cervical cancer-After First year-Females   |                   | \$1,425   |                             |        |
| Cervical cancer-Last year-Females          |                   | \$98,192  |                             |        |
| Colorectal cancer-First year-Females       |                   | \$56,460  |                             |        |
| Colorectal cancer-After First year-Females |                   | \$3,159   |                             |        |
| Colorectal cancer-Last year-Females        |                   | \$105,649 |                             |        |
| Esophageal cancer-First year-Females       |                   | \$87,486  |                             |        |
| Esophageal cancer-After First year-Females |                   | \$6,853   |                             |        |
| Esophageal cancer-Last year-Females        |                   | \$130,348 |                             |        |
| Renal cancer-First year-Females            |                   | \$42,237  |                             |        |
| Renal cancer-After First year-Females      |                   | \$6,255   |                             |        |
| Renal cancer -Last year-Females            |                   | \$92,304  |                             |        |
| Pancreatic cancer-First year-Females       |                   | \$102,808 |                             |        |
| Pancreatic cancer-After First year-Females |                   | \$8,672   |                             |        |
| Pancreatic cancer-Last year-Females        |                   | \$137,426 |                             |        |
| Stomach cancer-First year-Females          |                   | \$78,184  |                             |        |
| Stomach cancer-After First year-Females    |                   | \$3,977   |                             |        |
| Stomach cancer-Last year-Females           |                   | \$129,697 |                             |        |
| Uterine cancer-First year-Females          |                   | \$29,452  |                             |        |
| Uterine cancer-After First year-Females    |                   | \$1,535   |                             |        |
| Uterine cancer-Last year-Females           |                   | \$87,719  |                             |        |
| Colorectal cancer-First year-Males         |                   | \$25,386  |                             |        |
| Colorectal cancer-After First year-Males   |                   | \$2,207   |                             |        |
| Colorectal cancer-Last year-Males          |                   | \$78,570  |                             |        |
| Esophageal cancer-First year-Males         |                   | \$49,692  |                             |        |
| Esophageal cancer-After First year-Males   |                   | \$1,425   |                             |        |
| Esophageal cancer-Last year-Males          |                   | \$98,192  |                             |        |
| Renal cancer-First year-Males              |                   | \$56,460  |                             |        |
| Renal cancer-After First year-Males        |                   | \$3,159   |                             |        |
| Renal cancer-Last year-Males               |                   | \$105,649 |                             |        |
| Pancreatic cancer - First year-Males       |                   | \$87,486  |                             |        |

| Variable                                   | Distribution type | Mean      | Range or standard deviation | Source |
|--------------------------------------------|-------------------|-----------|-----------------------------|--------|
| Pancreatic cancer - After First year-Males |                   | \$6,853   |                             |        |
| Pancreatic cancer - Last year-Males        |                   | \$130,348 |                             |        |
| Prostate cancer - First year-Males         |                   | \$42,237  |                             |        |
| Prostate cancer - After First year-Males   |                   | \$6,255   |                             |        |
| Prostate cancer - Last year-Males          |                   | \$92,304  |                             |        |
| Stomach cancer - First year-Males          |                   | \$102,808 |                             |        |
| Stomach cancer - After First year-Males    |                   | \$8,672   |                             |        |
| Stomach cancer - Last year-Males           |                   | \$137,426 |                             |        |
| Annual wages                               | Triangular        | \$48,320  | \$37,286-\$94,873           | (65)   |

**Table S2:** The probabilities of developing the health outcomes and probabilities of death associated with them

| Variables                                                             | Distribution Type | Mean    | Range        | Source       |
|-----------------------------------------------------------------------|-------------------|---------|--------------|--------------|
| <b>Probability of developing coronary heart disease (CHD)</b>         |                   |         |              |              |
| at CHS2                                                               | Triangular        | 0.01023 | 0-0.04       | (51, 52)     |
| at CHS3                                                               | Triangular        | 0.01193 | 0-0.047      |              |
| at CHS4                                                               | Triangular        | 0.01813 | 0-0.063      |              |
| multiplier for increased probability due to being overweight          | Triangular        | 1.31    | 1.22-1.4     | (52)         |
| multiplier for increased probability due to being obese               | Triangular        | 1.56    | 1.54-1.58    |              |
| <b>Probability of reoccurrence of CHD</b>                             |                   |         |              |              |
| at CHS2                                                               | Triangular        | 0.0427  | 0-0.1        | (53)         |
| at CHS3                                                               | Triangular        | 0.0347  | 0-0.057      |              |
| at CHS4                                                               | Triangular        | 0.0397  | 0-0.074      |              |
| <b>Probability of death due to CHD</b>                                |                   |         |              |              |
| at CHS2                                                               | Triangular        | 0.01023 | 0-0.04       | (51, 52)     |
| at CHS3                                                               | Triangular        | 0.01193 | 0-0.047      |              |
| at CHS4                                                               | Triangular        | 0.037   | 0.0007-0.113 |              |
| multiplier for increased probability of death due to being overweight | Triangular        | 1.175   | 0.98-1.37    |              |
| multiplier for increased probability of death due to being obese      | Triangular        | 1.375   | 1.3-1.45     |              |
| <b>Probability of developing Stroke</b>                               |                   |         |              |              |
| at CHS0                                                               | Uniform           | 0.06    | 0-0.012      | (51, 52, 54) |
| at CHS1                                                               | Uniform           | 0.075   | 0-0.015      |              |
| at CHS2                                                               | Uniform           | 0.085   | 0-0.017      |              |
| at CHS3                                                               | Uniform           | 0.075   | 0-0.015      |              |
| at CHS4                                                               | Uniform           | 0.014   | 0-0.028      |              |
| multiplier for increased probability due to being overweight          | Uniform           | 1.115   | 1.06-1.17    | (55, 56)     |
| multiplier for increased probability due                              | Uniform           | 1.325   | 1.23-1.42    |              |

|                                                                        |         |         |               |          |
|------------------------------------------------------------------------|---------|---------|---------------|----------|
| to being obese                                                         |         |         |               |          |
| Probability of reoccurrence of Stroke at first year                    | Uniform | 0.1287  | 0.0924-0.165  | (57)     |
| Probability of reoccurrence of Stroke after first year                 | Uniform | 0.0443  | 0.0318-0.0567 |          |
| <b>Probability of death due to stroke</b>                              |         |         |               |          |
| In the first year of developing stroke                                 | Uniform | 0.188   | 0.135-0.241   | (57)     |
| After First year of developing stroke                                  | Uniform | 0.083   | 0.0596-0.1064 |          |
| <b>Probabilities associated with diabetes complications</b>            |         |         |               |          |
| Probability of developing Diabetic nephropathy by years of having T2DM | Uniform | 0.14    | 0-0.28        | (58)     |
| Probability of developing ESRD                                         |         | 0.0082  |               | (59)     |
| Probability of death from ESRD (by age)                                | Uniform | 0.16    | 0.081-0.239   | (60)     |
| Probability of developing Diabetic neuropathy by years of having T2DM  | Uniform | 0.36    | 0-0.72        | (58)     |
| Probability of Diabetic neuropathy by years of having T2DM             | Uniform | 0.14    | 0-0.28        | (58)     |
| Probability of developing blindness                                    | Uniform | 0.4     | 0-0.8         | (61, 62) |
| <b>Probabilities of developing Cancer for females</b>                  |         |         |               |          |
| Breast                                                                 | Uniform | 0.0096  | 0-0.0191      | (63, 64) |
| Cervical                                                               | Uniform | 0.00035 | 0-0.0007      |          |
| Colorectal                                                             | Uniform | 0.0033  | 0-0.0066      |          |
| Esophageal                                                             | Uniform | 0.0002  | 0-0.0004      |          |
| Renal                                                                  | Uniform | 0.0009  | 0-0.0018      |          |
| Pancreatic                                                             | Uniform | 0.00125 | 0-0.0025      |          |
| Stomach                                                                | Uniform | 0.0005  | 0-0.001       |          |
| Uterine                                                                | Uniform | 0.0022  | 0-0.0044      |          |
| <b>Probabilities of developing Cancer for males</b>                    |         |         |               |          |
| Colorectal                                                             | Uniform | 0.0036  | 0-0.0071      | (63, 64) |
| Esophageal                                                             | Uniform | 0.00065 | 0-0.0013      |          |
| Renal                                                                  | Uniform | 0.00155 | 0-0.0031      |          |
| Pancreatic                                                             | Uniform | 0.00125 | 0-0.0025      |          |
| Prostate                                                               | Uniform | 0.0142  | 0-0.0284      |          |
| Stomach                                                                | Uniform | 0.00085 | 0-0.0017      |          |
| <b>Probabilities of death due to Cancer for females</b>                |         |         |               |          |
| Breast                                                                 | Uniform | 0.034   | 0.008-0.06    | (64)     |
| Cervical                                                               | Uniform | 0.0445  | 0.006-0.083   |          |
| Colorectal                                                             | Uniform | 0.066   | 0.027-0.105   |          |
| Esophageal                                                             | Uniform | 0.2305  | 0.035-0.426   |          |
| Renal                                                                  | Uniform | 0.034   | 0.011-0.057   |          |
| Pancreatic                                                             | Uniform | 0.161   | 0.033-0.289   |          |
| Stomach                                                                | Uniform | 0.172   | 0.03-0.314    |          |
| Uterine                                                                | Uniform | 0.0275  | 0.007-0.048   |          |
| <b>Probabilities of death due to Cancer for males</b>                  |         |         |               |          |
| Colorectal                                                             | Uniform | 0.089   | 0.016-0.162   |          |

|            |         |        |             |      |
|------------|---------|--------|-------------|------|
| Esophageal | Uniform | 0.2135 | 0.018-0.409 | (64) |
| Renal      | Uniform | 0.0385 | 0.008-0.069 |      |
| Pancreatic | Uniform | 0.1765 | 0.018-0.335 |      |
| Prostate   | Uniform | 0.033  | 0.015-0.051 |      |
| Stomach    | Uniform | 0.1395 | 0.015-0.264 |      |

Table S3: Transition probabilities for adults Age &lt;= 45 years old

|         | N_CHS0 | N_CHS1 | N_CHS2 | N_CHS3 | N_CHS4 | OW_CHS0 | OW_CHS1 | OW_CHS2 | OW_CHS3 | OW_CHS4 | OB_CHS0 | OB_CHS1 | OB_CHS2 | OB_CHS3 | OB_CHS4 |
|---------|--------|--------|--------|--------|--------|---------|---------|---------|---------|---------|---------|---------|---------|---------|---------|
| N_CHS0  | 0.932  | 0.016  | 0.001  | 0      | 0      | 0.048   | 0.002   | 0       | 0       | 0       | 0       | 0       | 0       | 0       | 0       |
| N_CHS1  | 0.023  | 0.9    | 0.007  | 0.007  | 0      | 0.002   | 0.051   | 0.002   | 0.002   | 0       | 0.001   | 0.001   | 0.003   | 0       | 0       |
| N_CHS2  | 0.002  | 0.015  | 0.811  | 0.012  | 0.007  | 0       | 0       | 0.067   | 0.046   | 0.007   | 0       | 0       | 0.023   | 0.002   | 0.001   |
| N_CHS3  | 0      | 0      | 0.024  | 0.844  | 0.002  | 0       | 0       | 0.046   | 0.067   | 0.003   | 0       | 0       | 0       | 0.002   | 0.001   |
| N_CHS4  | 0      | 0      | 0      | 0.058  | 0.86   | 0       | 0       | 0       | 0       | 0.046   | 0       | 0       | 0       | 0       | 0.026   |
| OW_CHS0 | 0.008  | 0.001  | 0      | 0      | 0      | 0.93    | 0.019   | 0.001   | 0       | 0       | 0.028   | 0.003   | 0.001   | 0       | 0       |
| OW_CHS1 | 0.001  | 0.009  | 0.003  | 0.002  | 0.001  | 0.018   | 0.90    | 0.014   | 0.008   | 0       | 0.004   | 0.027   | 0.003   | 0.003   | 0       |
| OW_CHS2 | 0      | 0.003  | 0.019  | 0.007  | 0      | 0.027   | 0.049   | 0.807   | 0.012   | 0.011   | 0       | 0.004   | 0.039   | 0.008   | 0.004   |
| OW_CHS3 | 0      | 0      | 0      | 0.009  | 0      | 0       | 0       | 0.025   | 0.879   | 0       | 0       | 0       | 0.041   | 0.041   | 0       |
| OW_CHS4 | 0      | 0      | 0      | 0.002  | 0.022  | 0       | 0       | 0       | 0.005   | 0.936   | 0       | 0       | 0       | 0       | 0.03    |
| OB_CHS0 | 0      | 0      | 0      | 0      | 0      | 0.006   | 0       | 0       | 0       | 0       | 0.94    | 0.04    | 0.002   | 0.001   | 0.001   |
| OB_CHS1 | 0      | 0.001  | 0      | 0      | 0      | 0.002   | 0.002   | 0       | 0       | 0       | 0.016   | 0.94    | 0.025   | 0.008   | 0.002   |
| OB_CHS2 | 0      | 0.002  | 0      | 0      | 0      | 0       | 0.008   | 0.002   | 0.001   | 0       | 0.025   | 0.037   | 0.88    | 0.028   | 0.015   |
| OB_CHS3 | 0      | 0      | 0.001  | 0.006  | 0      | 0       | 0       | 0.004   | 0.01    | 0.003   | 0       | 0       | 0.046   | 0.921   | 0.008   |
| OB_CHS4 | 0      | 0      | 0      | 0      | 0.001  | 0       | 0       | 0       | 0       | 0.012   | 0       | 0       | 0       | 0       | 0.986   |

**N: Normal Weight**

**OW: Overweight**

**OB: Obese**

**Table S4:** Transition probabilities for adults Age > 45 years old

|         | N_CHS0 | N_CHS1 | N_CHS2 | N_CHS3 | N_CHS4 | OW_CHS0 | OW_CHS1 | OW_CHS2 | OW_CHS3 | OW_CHS4 | OB_CHS0 | OB_CHS1 | OB_CHS2 | OB_CHS3 | OB_CHS4 |
|---------|--------|--------|--------|--------|--------|---------|---------|---------|---------|---------|---------|---------|---------|---------|---------|
| N_CHS0  | 0.865  | 0.102  | 0.001  | 0      | 0      | 0.012   | 0.011   | 0.002   | 0       | 0       | 0.001   | 0.001   | 0       | 0       | 0       |
| N_CHS1  | 0.034  | 0.902  | 0.024  | 0.014  | 0      | 0.006   | 0.012   | 0.002   | 0.002   | 0       | 0.001   | 0       | 0.002   | 0       | 0       |
| N_CHS2  | 0.036  | 0.053  | 0.869  | 0.015  | 0.004  | 0       | 0       | 0.015   | 0.002   | 0       | 0       | 0       | 0       | 0.001   | 0       |
| N_CHS3  | 0      | 0      | 0.008  | 0.959  | 0.008  | 0       | 0       | 0       | 0.018   | 0.001   | 0       | 0       | 0       | 0       | 0       |
| N_CHS4  | 0      | 0      | 0.007  | 0.011  | 0.948  | 0       | 0       | 0       | 0       | 0.018   | 0       | 0       | 0       | 0       | 0.002   |
| OW_CHS0 | 0.008  | 0.004  | 0      | 0      | 0      | 0.876   | 0.069   | 0.013   | 0       | 0       | 0.013   | 0.014   | 0.001   | 0       | 0       |
| OW_CHS1 | 0.004  | 0.004  | 0.003  | 0      | 0      | 0.023   | 0.912   | 0.027   | 0.014   | 0       | 0.002   | 0.007   | 0.002   | 0       | 0       |
| OW_CHS2 | 0      | 0.007  | 0.004  | 0.001  | 0      | 0.003   | 0.039   | 0.90    | 0.019   | 0.006   | 0       | 0.002   | 0.009   | 0.001   | 0.001   |
| OW_CHS3 | 0      | 0      | 0      | 0.005  | 0      | 0       | 0       | 0.013   | 0.957   | 0.01    | 0       | 0       | 0.001   | 0.009   | 0       |
| OW_CHS4 | 0      | 0      | 0      | 0.001  | 0.007  | 0       | 0       | 0       | 0.009   | 0.962   | 0       | 0       | 0       | 0       | 0.01    |
| OB_CHS0 | 0.001  | 0      | 0      | 0      | 0      | 0.007   | 0       | 0       | 0       | 0       | 0.866   | 0.079   | 0.043   | 0       | 0.002   |
| OB_CHS1 | 0      | 0      | 0      | 0      | 0      | 0.003   | 0.005   | 0       | 0       | 0       | 0.016   | 0.913   | 0.039   | 0.02    | 0       |
| OB_CHS2 | 0      | 0.001  | 0      | 0      | 0      | 0       | 0.001   | 0.005   | 0.001   | 0       | 0.001   | 0.032   | 0.919   | 0.026   | 0.011   |
| OB_CHS3 | 0      | 0      | 0      | 0      | 0      | 0       | 0       | 0.001   | 0.006   | 0.001   | 0       | 0       | 0.013   | 0.959   | 0.017   |
| OB_CHS4 | 0      | 0      | 0      | 0      | 0      | 0       | 0       | 0       | 0       | 0.008   | 0       | 0       | 0       | 0       | 0.984   |

N: Normal Weight

OW: Overweight

OB: Obesity



## References:

1. Adarkwah CC, Gandjour A, Akkerman M, Evers S. To treat or not to treat? Cost-effectiveness of ace inhibitors in non-diabetic advanced renal disease-a Dutch perspective. *Kidney and Blood Pressure Research*. 2013;37(2-3):168-80.
2. Aspinall SL, Smith KJ, Good CB, Zhao X, Stone RA, Tonnu-Mihara IQ, et al. Incremental cost effectiveness of pharmacist-managed erythropoiesis-stimulating agent clinics for non-dialysis-dependent chronic kidney disease patients. *Applied health economics and health policy*. 2013;11(6):653-60.
3. Athanasakis K, Petrakis I, Karampli E, Vitsou E, Lyras L, Kyriopoulos J. Pregabalin versus gabapentin in the management of peripheral neuropathic pain associated with post-herpetic neuralgia and diabetic neuropathy: a cost effectiveness analysis for the Greek healthcare setting. *BMC neurology*. 2013;13(1):1.
4. Attard CL, Brown S, Alloul K, Moore MJ. Cost-effectiveness of FOLFIRINOX for first-line treatment of metastatic pancreatic cancer. *Current Oncology*. 2013;21(1):41-51.
5. Bellows BK, Dahal A, Jiao T, Biskupiak J. A cost-utility analysis of pregabalin versus duloxetine for the treatment of painful diabetic neuropathy. *Journal of pain & palliative care pharmacotherapy*. 2012;26(2):153-64.
6. Boger PC, Turner D, Roderick P, Patel P. A UK-based cost-utility analysis of radiofrequency ablation or oesophagectomy for the management of high-grade dysplasia in Barrett's oesophagus. *Alimentary pharmacology & therapeutics*. 2010;32(11-12):1332-42.
7. Borisenko O, Beige J, Lovett EG, Hoppe UC, Bjessmo S. Cost-effectiveness of Barostim therapy for the treatment of resistant hypertension in European settings. *Journal of hypertension*. 2014;32(3):681-92.
8. Botteman M, Meijboom M, Foley I, Stephens J, Chen Y, Kaura S. Cost-effectiveness of zoledronic acid in the prevention of skeletal-related events in patients with bone metastases secondary to advanced renal cell carcinoma: application to France, Germany, and the United Kingdom. *The European Journal of Health Economics*. 2011;12(6):575-88.
9. Bresse X, Goergen C, Prager B, Joura E. Universal vaccination with the quadrivalent HPV vaccine in Austria: impact on virus circulation, public health and cost-effectiveness analysis. *Expert review of pharmacoeconomics & outcomes research*. 2014;14(2):269-81.
10. Brown ST, Grima DG, Sauriol L. Cost-effectiveness of insulin glargine versus sitagliptin in insulin-naïve patients with type 2 diabetes mellitus. *Clinical therapeutics*. 2014;36(11):1576-87.
11. Choudhry NK, Patrick AR, Glynn RJ, Avorn J. The cost-effectiveness of C-reactive protein testing and rosuvastatin treatment for patients with normal cholesterol levels. *Journal of the American College of Cardiology*. 2011;57(7):784-91.
12. Das A, Ngamruengphong S, Nagendra S, Chak A. Asymptomatic pancreatic cystic neoplasm: a cost-effectiveness analysis of different strategies of management. *Gastrointestinal endoscopy*. 2009;70(4):690-9. e6.
13. Dorian P, Kongnakorn T, Phatak H, Rublee DA, Kuznik A, Lanitis T, et al. Cost-effectiveness of apixaban vs. current standard of care for stroke prevention in patients with atrial fibrillation. *European heart journal*. 2014;ehu006.
14. Folse HJ, Goswami D, Rengarajan B, Budoff M, Kahn R. Clinical-and cost-effectiveness of LDL particle-guided statin therapy: A simulation study. *Atherosclerosis*. 2014;236(1):154-61.
15. Fonseca T, Clegg J, Caputo G, Norrbacka K, Dilla T, Alvarez M. The cost-effectiveness of exenatide once weekly compared with exenatide twice daily and insulin glargine for the treatment of patients with type two diabetes and body mass index  $\geq 30$  kg/m<sup>2</sup> in Spain. *Journal of medical economics*. 2013;16(7):926-38.
16. Gladwell D, Henry T, Cook M, Akehurst R. Cost effectiveness of renal denervation therapy for the treatment of resistant hypertension in the UK. *Applied health economics and health policy*. 2014;12(6):611-22.
17. Gomes M, Aldridge RW, Wylie P, Bell J, Epstein O. Cost-effectiveness analysis of 3-D computerized tomography colonography versus optical colonoscopy for imaging symptomatic gastroenterology patients. *Applied health economics and health policy*. 2013;11(2):107-17.
18. Green LE, Dinh TA, Hinds DA, Walser BL, Allman R. Economic Evaluation of Using a Genetic Test to Direct Breast Cancer Chemoprevention in White Women with a Previous Breast Biopsy. *Applied health economics and health policy*. 2014;12(2):203-17.
19. Hoyle M, Green C, Thompson-Coon J, Liu Z, Welch K, Moxham T, et al. Cost-Effectiveness of Temeirolimus for First Line Treatment of Advanced Renal Cell Carcinoma. *Value in Health*. 2010;13(1):61-8.

20. Kaambwa B, Bryan S, Jowett S, Mant J, Bray EP, Hobbs FR, et al. Telemonitoring and self-management in the control of hypertension (TASMINH2): a cost-effectiveness analysis. *European journal of preventive cardiology*. 2013;2047487313501886.
21. Kohn CG, Parker MW, Limone BL, Coleman CI. Cost-effectiveness of ranolazine added to standard-of-care treatment in patients with chronic stable angina pectoris. *The American journal of cardiology*. 2014;113(8):1306-11.
22. Kondo M, Yamagata K, Hoshi S-L, Saito C, Asahi K, Moriyama T, et al. Cost-effectiveness of chronic kidney disease mass screening test in Japan. *Clinical and experimental nephrology*. 2012;16(2):279-91.
23. Kongnakorn T, Lanitis T, Annemans L, Thijs V, Goethals M, Marbaix S, et al. Stroke and systemic embolism prevention in patients with atrial fibrillation in Belgium: comparative cost effectiveness of new oral anticoagulants and warfarin. *Clinical drug investigation*. 2015;35(2):109-19.
24. Kreidieh B, Rodríguez-Mañero M, Ibarra-Cortez SH, Schurmann P, Valderrábano M. The Cost Effectiveness of LAA Exclusion. *JAFIB: Journal of Atrial Fibrillation*. 2016;8(5).
25. Krzyzanowska MK, Earle CC, Kuntz KM, Weeks JC. Using economic analysis to evaluate the potential of multimodality therapy for elderly patients with locally advanced pancreatic cancer. *International Journal of Radiation Oncology\* Biology\* Physics*. 2007;67(1):211-8.
26. Kwon JS, Carey MS, Goldie SJ, Kim JJ. Cost-effectiveness analysis of treatment strategies for Stage I and II endometrial cancer. *Journal of Obstetrics and Gynaecology Canada*. 2007;29(2):131-9.
27. Lairson DR, Parikh RC, Cormier JN, Chan W, Du XL. Cost-Utility Analysis of Chemotherapy Regimens in Elderly Patients with Stage III Colon Cancer. *Pharmacoeconomics*. 2014;32(10):1005-13.
28. Lee CI, Cevik M, Alagoz O, Sprague BL, Tosteson AN, Miglioretti DL, et al. Comparative effectiveness of combined digital mammography and tomosynthesis screening for women with dense breasts. *Radiology*. 2014;274(3):772-80.
29. Masterton RG, Casamayor M, Musingarimi P, van Engen A, Zinck R, Odufowora-Sita O, et al. De-escalation from micafungin is a cost-effective alternative to traditional escalation from fluconazole in the treatment of patients with systemic *Candida* infections. *Journal of medical economics*. 2013.
30. Melnikow J, Birch S, Slee C, McCarthy TJ, Helms LJ, Kuppermann M. Tamoxifen for breast cancer risk reduction: impact of alternative approaches to quality-of-life adjustment on cost-effectiveness analysis. *Medical care*. 2008;46(9):946-53.
31. Morais J, Aguiar C, McLeod E, Chatzitheofilou I, Santos IF, Pereira S. Cost-effectiveness of rivaroxaban for stroke prevention in atrial fibrillation in the Portuguese setting. *Revista Portuguesa de Cardiologia*. 2014;33(9):535-44.
32. Murphy JD, Chang DT, Abelson J, Daly ME, Yeung HN, Nelson LM, et al. Cost-effectiveness of modern radiotherapy techniques in locally advanced pancreatic cancer. *Cancer*. 2012;118(4):1119-29.
33. Pataky R, Ismail Z, Coldman AJ, Elwood M, Gelmon K, Hedden L, et al. Cost-effectiveness of annual versus biennial screening mammography for women with high mammographic breast density. *Journal of medical screening*. 2014;21(4):180-8.
34. Paz-Ares L, Del Muro J, Grande E, Diaz S. A cost-effectiveness analysis of sunitinib in patients with metastatic renal cell carcinoma intolerant to or experiencing disease progression on immunotherapy: perspective of the Spanish National Health System. *Journal of clinical pharmacy and therapeutics*. 2010;35(4):429-38.
35. Pietzsch JB, Liu S, Garner AM, Kezirian EJ, Strollo PJ. Long-Term Cost-Effectiveness of Upper Airway Stimulation for the Treatment of Obstructive Sleep Apnea: A Model-Based Projection Based on the STAR Trial. *Sleep*. 2015;38(5):735-44.
36. Rachapelle S, Legood R, Alavi Y, Lindfield R, Sharma T, Kuper H, et al. The cost-utility of telemedicine to screen for diabetic retinopathy in India. *Ophthalmology*. 2013;120(3):566-73.
37. Rupnow MF, Chang AH, Shachter RD, Owens DK, Parsonnet J. Cost-effectiveness of a potential prophylactic *Helicobacter pylori* vaccine in the United States. *Journal of Infectious Diseases*. 2009;200(8):1311-7.
38. Schaufler TM, Wolff M. Cost effectiveness of preventive screening programmes for type 2 diabetes mellitus in Germany. *Applied health economics and health policy*. 2010;8(3):191-202.
39. Scotland GS, McNamee P, Fleming AD, Goatman KA, Philip S, Prescott GJ, et al. Costs and consequences of automated algorithms versus manual grading for the detection of referable diabetic retinopathy. *British Journal of Ophthalmology*. 2010;94(6):712-9.
40. Sharaiha RZ, Freedberg DE, Abrams JA, Wang YC. Cost-effectiveness of chemoprevention with proton pump inhibitors in Barrett's esophagus. *Digestive diseases and sciences*. 2014;59(6):1222-30.

41. Wilson FA, Villarreal R, Stimpson JP, Pagán JA. Cost-effectiveness analysis of a colonoscopy screening navigator program designed for Hispanic men. *Journal of Cancer Education*. 2015;30(2):260-7.
42. Wisløff T, Hagen G, Klemp M. Economic evaluation of warfarin, dabigatran, rivaroxaban, and apixaban for stroke prevention in atrial fibrillation. *Pharmacoeconomics*. 2014;32(6):601-12.
43. Wu B, Kun L, Liu X, He B. Cost-Effectiveness of Different Strategies for Stroke Prevention in Patients with Atrial Fibrillation in a Health Resource-Limited Setting. *Cardiovascular drugs and therapy*. 2014;28(1):87-98.
44. Xie F, O'Reilly D, Ferrusi IL, Blackhouse G, Bowen JM, Tarride J-E, et al. Illustrating economic evaluation of diagnostic technologies: comparing *Helicobacter pylori* screening strategies in prevention of gastric cancer in Canada. *Journal of the American College of Radiology*. 2009;6(5):317-23.
45. Yang KY, Caughey AB, Little SE, Cheung MK, Chen L-M. A cost-effectiveness analysis of prophylactic surgery versus gynecologic surveillance for women from hereditary non-polyposis colorectal cancer (HNPCC) families. *Familial cancer*. 2011;10(3):535-43.
46. Zhou HJ, Dan YY, Naidoo N, Li SC, Yeoh KG. A cost-effectiveness analysis evaluating endoscopic surveillance for gastric cancer for populations with low to intermediate risk. *PloS one*. 2013;8(12):e83959.
47. Quality AfHRA. Medical Expenditure Panel Survey In: Quality AfHRA, editor.: Agency for Healthcare Research and Quality; 2012.
48. Gordois A, Scuffham P, Shearer A, Oglesby A. The health care costs of diabetic nephropathy in the United States and the United Kingdom. *Journal of diabetes and its complications*. 2004;18(1):18-26.
49. NIH. Annual Data Report: Atlas of Chronic Kidney Disease and End-Stage Renal Disease in the United States. Bethesda, MD: 2013.
50. Yang D, Li T, Liu Z, Arbez N, Yan J, Moran TH, et al. LRRK2 kinase activity mediates toxic interactions between genetic mutation and oxidative stress in a *Drosophila* model: suppression by curcumin. *Neurobiology of disease*. 2012;47(3):385-92.
51. D'Agostino Sr RB, Grundy S, Sullivan LM, Wilson P. Validation of the Framingham coronary heart disease prediction scores: results of a multiple ethnic groups investigation. *JAMA : the journal of the American Medical Association*. 2001;286(2):180-7.
52. Wilson PW, D'Agostino RB, Sullivan L, Parise H, Kannel WB. Overweight and obesity as determinants of cardiovascular risk: the Framingham experience. *Archives of internal medicine*. 2002;162(16):1867-72.
53. Rea TD, Heckbert SR, Kaplan RC, Smith NL, Lemaitre RN, Psaty BM. Smoking status and risk for recurrent coronary events after myocardial infarction. *Annals of Internal Medicine*. 2002;137(6):494-500.
54. Pender JR, Pories WJ. Epidemiology of obesity in the United States. *Gastroenterology clinics of North America*. 2005;34(1):1-7.
55. Rexrode KM, Hennekens CH, Willett WC, Colditz GA, Stampfer MJ, Rich-Edwards JW, et al. A prospective study of body mass index, weight change, and risk of stroke in women. *Jama*. 1997;277(19):1539-45.
56. Walker SP, Rimm EB, Ascherio A, Kawachi I, Stampfer MJ, Willett WC. Body size and fat distribution as predictors of stroke among US men. *American Journal of Epidemiology*. 1996;144(12):1143-50.
57. Sacco RL, Shi T, Zamanillo M, Kargman D. Predictors of mortality and recurrence after hospitalized cerebral infarction in an urban community The Northern Manhattan Stroke Study. *Neurology*. 1994;44(4):626-.
58. Orchard TJ, Dorman JS, Maser RE, Becker DJ, Drash AL, Ellis D, et al. Prevalence of complications in IDDM by sex and duration: Pittsburgh Epidemiology of Diabetes Complications Study II. *Diabetes*. 1990;39(9):1116-24.
59. Kiberd BA, Clase CM. Cumulative risk for developing end-stage renal disease in the US population. *Journal of the American Society of Nephrology*. 2002;13(6):1635-44.
60. Saran R, Li Y, Robinson B, Abbott KC, Agodoa L, Ayanian J, et al. US Renal Data System 2015 Annual Data Report: Epidemiology of Kidney Disease in the United States. *American journal of kidney diseases: the official journal of the National Kidney Foundation*. 2016;67(3 Suppl 1):A7.
61. Yau JW, Rogers SL, Kawasaki R, Lamoureux EL, Kowalski JW, Bek T, et al. Global prevalence and major risk factors of diabetic retinopathy. *Diabetes care*. 2012;35(3):556-64.
62. Klein R, Klein BE, Moss SE, Cruickshanks KJ. Relationship of hyperglycemia to the long-term incidence and progression of diabetic retinopathy. *Archives of internal medicine*. 1994;154(19):2169-78.
63. Fay MP, Pfeiffer R, Cronin KA, Le C, Feuer EJ. Age-conditional probabilities of developing cancer. *Statistics in medicine*. 2003;22(11):1837-48.

64. Hayat MJ, Howlader N, Reichman ME, Edwards BK. Cancer statistics, trends, and multiple primary cancer analyses from the Surveillance, Epidemiology, and End Results (SEER) Program. *The oncologist*. 2007;12(1):20-37.
65. Bureau of Labor Statistics USDoL. Occupational Employment Statistics, : Bureau of Labor Statistics; 2015 [cited 2016 01/12/2016]. Available from: [http://www.bls.gov/oes/current/oes\\_nat.htm](http://www.bls.gov/oes/current/oes_nat.htm).
